# Supplementary material
Source: PubMed Central journal article supplement (PMC1383668)

## **Supplementary Fig. 1**

**In situ hybridization of human lungs affected by pneumonia.** Bronchial epithelial layers from human lungs affected by pneumonia were subjected to in situ hybridization with antisense or sense cRNA probes for individual sPLA2s. Detailed procedures are described in MATERIALS AND METHODS

# Suppl. 1

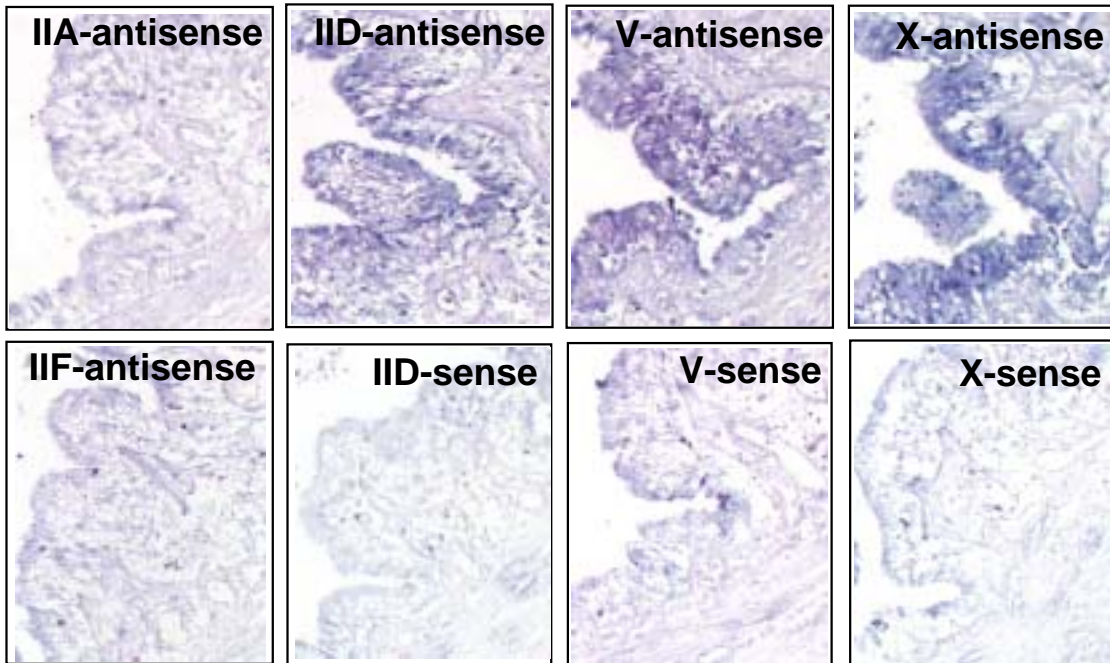

Supplement: bj3930097add.pdf [file bj3930097add.pdf]
